# Supplementary material for: The Impact of Charlson Comorbidity Index on the Functional Capacity of COVID-19 Survivors: A Prospective Cohort Study with One-Year Follow-Up
Source: MDPI journal article supplement (doi:10.3390/ijerph19127473), 2022-06-18
Supplement: s1 [file s1]

**Table S1. Association between Charlson Comorbidity Index and distance covered (meters) in the 6MWT test after Covid-19 hospitalization**

| n=41                        | R <sup>2</sup> | β     | 95% CI        |
|-----------------------------|----------------|-------|---------------|
| Crude model                 | 0.1022         | -18.7 | -34.7 to -2.6 |
| Adjusted model <sup>a</sup> | 0.3286         | -23.0 | -39.1 to -6.8 |

<sup>a</sup> Model adjusted for a propensity score including sex, days of hospitalization, and 1-minute sit-to-stand test (age is included in the score of the Charlson Comorbidity Index).
